# Supplementary material for: Identification and Expression Profile of Chemosensory Receptor Genes in Aromia bungii (Faldermann) Antennal Transcriptome
Source: MDPI journal article supplement (doi:10.3390/insects13010096), 2022-01-14
Supplement: s1 [file s1]

## Supplementary Materials

# Identification and Expression Profile of Chemosensory Receptor Genes Based on *Aromia bungii* (Faldermann) Antennal Transcriptome

Zhenchen Wu<sup>1</sup>, Jia Ye<sup>1</sup>, Jiali Qian<sup>1</sup>, Endang Rinawati Purba<sup>2</sup>, Qing-He Zhang<sup>3</sup>, Longwa, Zhang<sup>1\*</sup>, Dingze Mang<sup>4\*</sup>

<sup>1</sup> Anhui Provincial Key Laboratory of Microbial Control, Engineering Research Center of Fungal Biotechnology, Ministry of Education, School of Forestry & Landscape Architecture, Anhui Agricultural University, Hefei, 230036, China; wuzhenchen8972@163.com (Z.W.); yejia.yj@foxmail.com (J.Y.); qianjiali1995@163.com (J.Q.); zhanglw@ahau.edu.cn (L. Z.)

<sup>2</sup> Structural Cellular Biology Unit, Okinawa Institute of Science and Technology Graduate University, 1919-1 Tancha, Onna-son, Okinawa, 904-0495, Japan; endang.purba@oist.jp (E.R.P.)

<sup>3</sup> Sterling International, Inc., Spokane, WA 99216, USA; qinghezhang2001@yahoo.com (Q.Z.)

<sup>4</sup> Graduate School of Bio-Applications and Systems Engineering, Tokyo University of Agriculture and Technology, Koganei 2-24-16, Tokyo 184-8588, Japan; mang@go.tuat.ac.jp (D. M.)

\*Corresponding authors:

zhanglw@ahau.edu.cn (L. Z.), Tel: 13637082053; mang@go.tuat.ac.jp (D. M.), Tel: +81-080-4375-8788

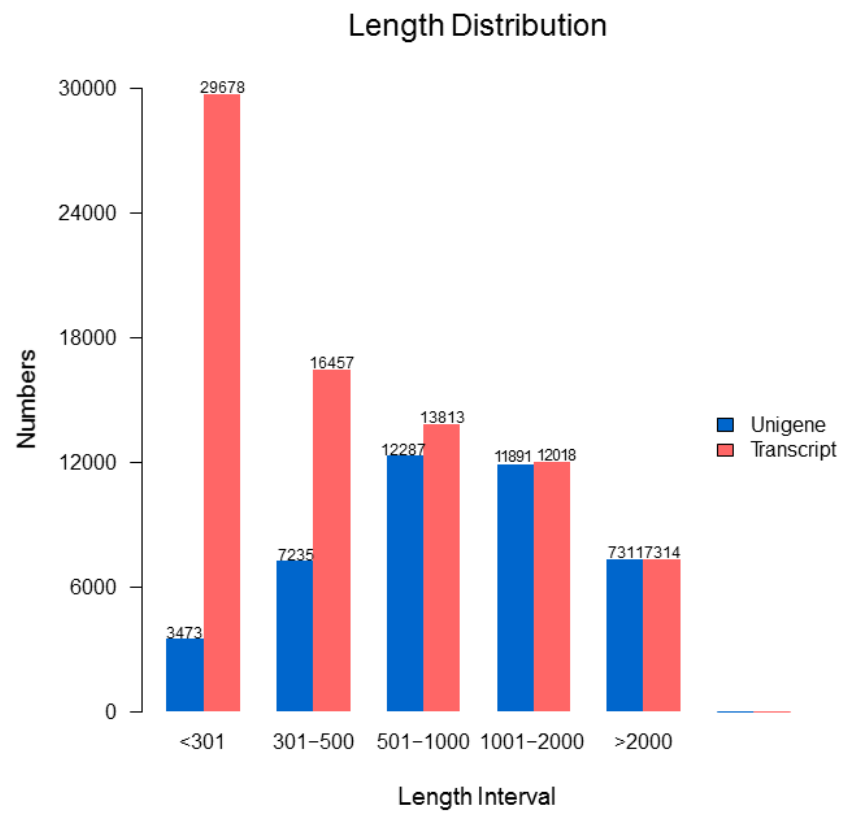

**Figure S1. Distribution of Unigenes and Transcripts length interval in the *A. bungii* transcriptome assembly.** The abscissa is the spliced transcript/gene length interval, and the ordinate is the number of spliced transcripts/genes at each length.

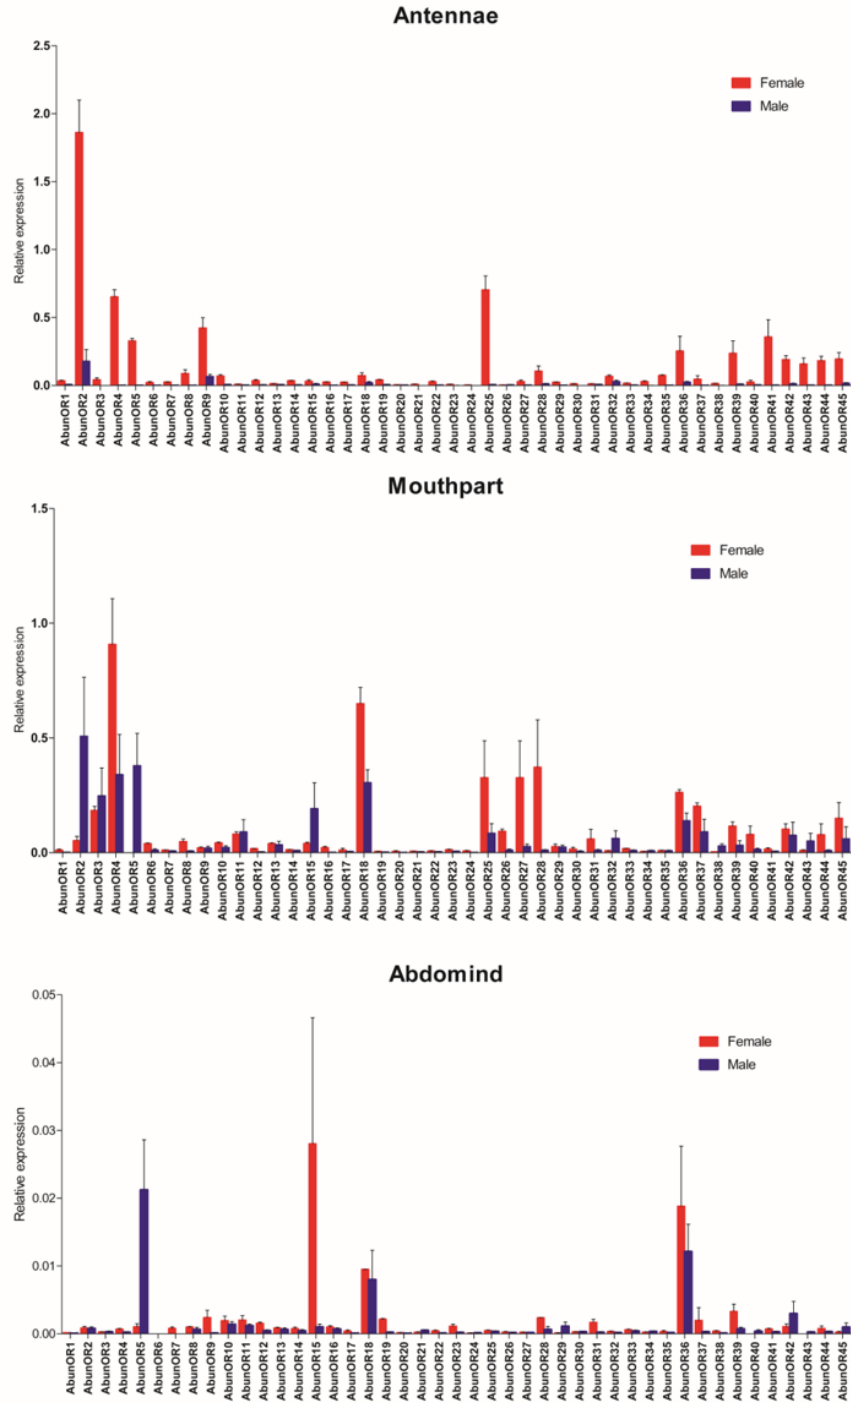

**Figure S2. Analysis of the relative expression of 45 AbunORs in female and male tissues.** The X-axis represents AbunORs, and the Y-axis represents relative expression. The relative mRNA levels were normalized to those of the actin gene and analyzed using the Q-gene method. All values are shown as mean  $\pm$  SEM normalized. The data were analyzed by least significant difference test after one-way analysis of variance. FA: female antennae; MA: male antennae; FM: female mouthpart (maxillary palps and labial palps); MM: male mouthpart (maxillary palps and labial palps); FAb: female abdominal end; MAb: male abdominal end.

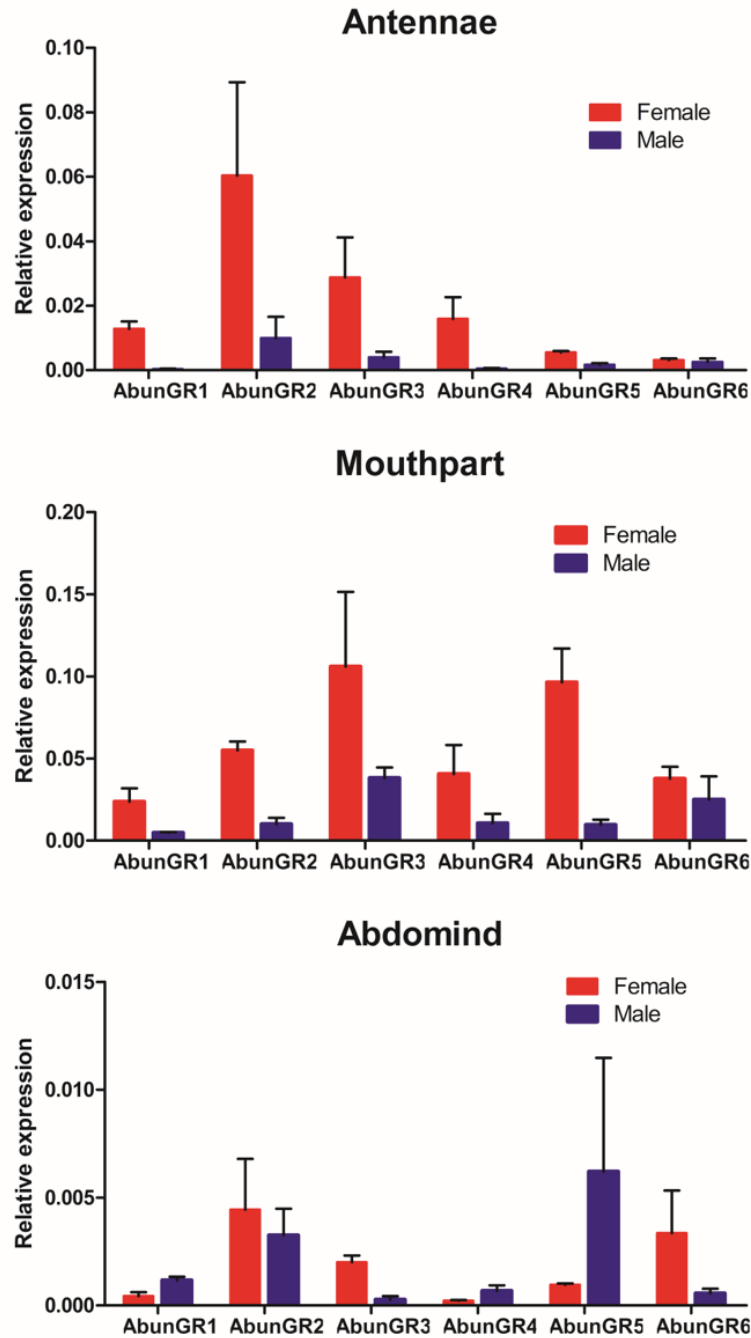

**Figure S3. Analysis of the relative expression of 6 AbunGRs in female and male tissues.** The X-axis represents AbunGRs, and the Y-axis represents relative expression. The relative mRNA levels were normalized to those of the actin gene and analyzed using the Q-gene method. All values are shown as mean  $\pm$  SEM normalized. The data were analyzed by least significant difference test after one-way analysis of variance. FA: female antennae; MA: male antennae; FM: female mouthpart (maxillary palps and labial palps); MM: male mouthpart (maxillary palps and labial palps); FAb: female abdominal end; MAb: male abdominal end.

```

AbunIR2 ----- 1
PstrIR47 -----MRPVLLLLTLFRVITGDQQSVTVDLISDFLLKLNAPTkinahI 43
AcorIR75q FETMISWKYNTLLFTALCITVICSENMEFIEIFKDFLLMQKRPTKVFLYL 50

AbunIR2 ----- 1
PstrIR47 CWPKEEQIALLKRLSSSNFGCRIGNFNINISYSTPAEHQLFLDLSCKGSE 93
AcorIR75q CWPVKEKVLVARYLNKYSFSFQFNTQLKLPIFKKSTEQLFLDLIRCTQYL 100

AbunIR2 ----- 1
PstrIR47 KILNKASELNLFNQPFRLWMGVMDSILDNFIYRLDSRVFIVEKETEDA 143
AcorIR75q NLLYMANLNKLYQQPYRWFLIVNESITLPHFLEILVDSQLYIVQNASPAV 150

AbunIR2 -----MGAPF 5
PstrIR47 YRIESPYKVTEENSLEYSMNVVAEWNRIIGGFSVYRELSYSRNRNLMGLNI 193
AcorIR75q YVSISSLYKISKYSENFVENDVARWSRLRFSYFHPVSAVRNRRTNLLGMPM 200
               : * :

AbunIR2 RVSYPVDFNPDLSNHIYDYRDRHIDTVSKSNYLAVHYMMEAINTEVPPEKI 55
PstrIR47 NISYVVTNKDTMNHLEDYRNKHIDPISKLNWFIMKHLISLLNATST-PLF 242
AcorIR75q NISYVITNNDLSNHLWDYRDKHIDGVSKLNYLSHYIIDAINVSGY-FIV 249
               .:***. * :*:***: ***:***: ** *: : : : : :*: .: 35

AbunIR2 YNTRGYKKRDTD-KYDNMFGDIQRNEIEISGVSSIITAERMKIQEFIHKS 104
PstrIR47 QPSWGYRDNVSTKFTGMTGDLQSGKAFFGGTALFFTIDRIDVIEYIAPS 292
AcorIR75q RSTWGYKNVTTN-LYDGLIGDLQSGLAEEFAGTASFTPDRLIIVDYIAPT 298
               : **: . : : :*: * . *: .: : * *: : :*: :

AbunIR2 FGSHVRFVFRAPLLAYVTNIFTVPFDTYVWYASFVLVAVILLILYVIVRW 154
PstrIR47 VPTFMKFIFRAPPLSYVSNVFTLPFDTYVWYSCFGLVPLIFVVVYVIVWV 342
AcorIR75q TPTRAKFIFRAPPLSYVRNVFTQPFDKMVWYASFLLAVISIIYVIVKW 348
               : :*:***: ***: ***: ***. ***: * *: .: * : :*:***: *

AbunIR2 EWKLFKLDGSGAPVLD-----ENVFDVFVAEFGALTQQGSEAEPRSVS 197
PstrIR47 EWKDPVFKEKVGEMHANCISPLRPSFIDVLVMELGAITQQGTDTEPKSNA 392
AcorIR75q EWSSSKFQNIstkQNV-----MKPKYVDVLLMELSAICQQGSETEPRSGA 393
               ** . : . : . :*: :*: * *: :*:***:***: * 119

AbunIR2 GRTAMLFTFIAFMFLYNACANIIAVLQSTSESIRSPEDLYNSDIAVGAE 247
PstrIR47 GRIATVFAFIACMFLYTSYSANIVAILQSTTESIKTDDLLNSRISLGEV 442
AcorIR75q GQISVIVVFLTFMFLYTSYSANIVALLQSTSDSIQTVDLLNSRIKLGEV 443
               *: : : .:***: ***:***:***:***:***: :* * * * :* * 157

AbunIR2 DIIYSRVFFKAETHPVKKKVDEKLQ-----FMGVEEGVRRVKNEFFA 290
PstrIR47 DIVYAHYYFKTAEPPVRKAIYQOKIAPKGQKPNFMTIEDGMSRVQKGFFA 492
AcorIR75q DKPYSYYYFKIQTEKTRKAIYTQKVAPVGQKPNFMNVEEGIRRMKDEFFA 493
               * *: :** . :*: :*: ** *:***: * :. *** 182

AbunIR2 FHSETTNLFKYIGETFADSDICRLRYLNFLELKFDTFHSVPNRNSTYKELL 340
PstrIR47 FHVEVSNGYKVVDTFQENKCSLKEIAFINL-VEPWVSIKRASPYKEIV 541
AcorIR75q FHVECASGYKIVADIFQSEKCGLEIEYWQI-IDPWWAVKKNSSYKELV 542
               ** * : . : * : : * : : : : : : : : : * .***: 210

AbunIR2 KYTLTRMRRESGIIDCLRRRLFSEEPKCFSGS-FGHVGIVECYAAYKIFA 389
PstrIR47 KVGRLRKILESQIRREINQLYTKKPVCHSKSGNFDASILDCAAFILFG 591
AcorIR75q KVAYRKLHESGIQREYRRLYAKKPIQSRGSGNFISVGFIDCYFPFLIFG 592
               * : : *** . :*:***: ***: * . : : : * : .: 238

AbunIR2 VGIACSVAILLEMLWKKIKEKISSYTDY----- 418
PstrIR47 AGLAVSFLCLTFEILLRKEFKRLMSSNVVLNYPELPNDDELAKSSVY 637
AcorIR75q VGNLITIAVLFIILYKSR-KRFQOKIYI----- 620
               .* : . * :*: * : : : . 249

```

Figure S4. Multiple amino acid sequence alignment of AbunIR2, PstrIR47 and AcorIR75q. The multiple alignment and homology of each IRs were calculated using ClustalW2 (<http://www.ebi.ac.uk/Tools/msa/clustalw2/>).

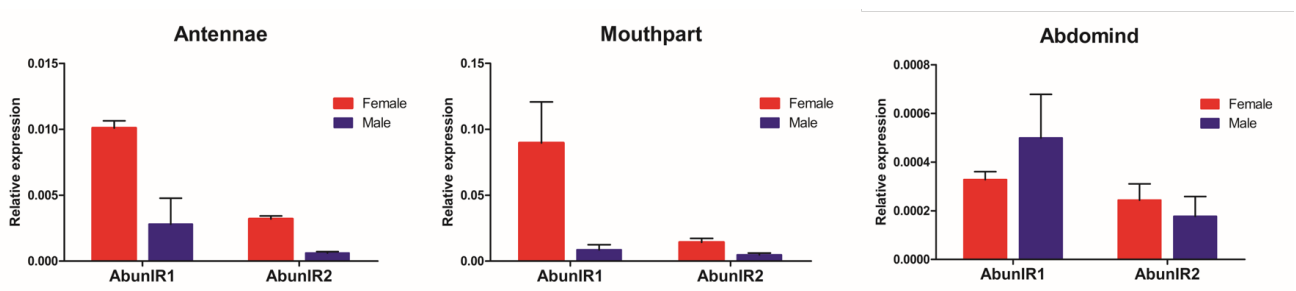

**Figure S5. Analysis of the relative expression of 2 AbunIRs in female and male tissues.** The X-axis represents AbunIRs, and the Y-axis represents relative expression. The relative mRNA levels were normalized to those of the actin gene and analyzed using the Q-gene method. All values are shown as mean  $\pm$  SEM normalized. The data were analyzed by least significant difference test after one-way analysis of variance. FA: female antennae; MA: male antennae; FM: female mouthpart (maxillary palps and labial palps); MM: male mouthpart (maxillary palps and labial palps); FAb: female abdominal end; MAb: male abdominal end.

```

AbunOR25 MMKFKVSGLVADLMPNIRLIQASGHFMLNYHADNSGALHTLRLGYCCIHVLFCLFQYGSIFANLVVEKDD 70
AgerOR25 MMKFKVSGLVADLMPNIRLIQTSGHFMFNYHADNSGALHTLRLAYS CMHLVLFCLFQFGCIFGNLVVEKDD 70
AchiOR1 MMKFKVSGLVADLMPNIRLIQASGHFMFNYHADNSGALHALRLGYSCAHLFLCLFQYGCIFGNLVVEKDD 70
AglaOrco MMKFKVSGLVADLMPNIRLIQASGHFMFNYHADNSGALHALRLGYSCAHLFLCLFQYGCIFGNLVVEKDD 70
*****:*****:*****:***.*.* **:******:*.**.****** 65

AbunOR25 VNELAANTITVLFFAHCITKFIYFAVRSKLFYRTLGIWNQANSHP LFVESNNRYHALALKKMRTLLICVG 140
AgerOR25 VNYLAANTITVLFFTHCITKFIYFAARSKLFYRTLGIWNQNSHP LFVESNNRYHALALKKMRTLLICVM 140
AchiOR1 VNYLAANTITVLFFTHCITKFIYFALRSKLFYRTLGIWNQNSHP LFVESNNRYHALALKKMRTLLICVT 140
AglaOrco VNYLAANTITVLFFTHCITKFIYFALRSKLFYRTLGIWNQNSHP LFVESNNRYHALALKKMRTLLICVT 140
** *****:*****:*** *****:*****:***** 132

AbunOR25 TTTVLSAAAWTGITFVGDSVHNKIDPENENETITEEIPRLLIKSWYPWDAMS GMPYYISLVFIYYVLF 210
AgerOR25 TTTVLSAAAWTSITFVEESVHNKIDPNENETITEEIPRLLIKSWYPWNAMS GMAYYVSLVFQIYYVLF 210
AchiOR1 ATTVLSAAAWTGITFVEESVHNKIDPDNENETITEEIPRLLVKSWYPWDAMS GMAYYGS LFIQIYYVLF 210
AglaOrco ATTVLSAAAWTGITFVEESVHNKIDPDNENETITEEIPRLLIKSWYPWDAMS GMAYYGS LFIQIYYVLF 210
:***:*.***.*** :***:***:*****:*****:*****:*** **.****** 197

AbunOR25 LSHANLMDSLFCSWLIFACEQLQHLKEIMKPLMELSASLD TYVPKSADLFRAPSATSQDNLIENDYNAKN 280
AgerOR25 LSHANLMDSLFCSWLIFACEQLQHLKEIMKPLMELSASLD TYVPKSADLFRAPSAKSQDNYIENDYNTKN 280
AchiOR1 LAHANLMDSLFCSWLIFACEQLQHLKEIMKPLMELSASLD TYVPKSADLFRAPSAKSQDNYIENDYNAKN 280
AglaOrco LAHANLMDSLFCSWLIFACEQLQHLKEIMKPLMELSASLD TYVPKSADLFRAPSAKSQDNYIENDYNAKN 280
*:*****:*****:*****.*** *****:*** 265

AbunOR25 EELNLKGVYNARQELGGHFRTGTLQTFGQGGGVGPNGLSKKQELMVRSAIKYWVERHKKHVRLVTAIGD 350
AgerOR25 EELNLKGIYNTRQELGGNFRSGALQTFGQGGGVGPNGLTKKQELMVRSAIKYWVERHKKHVRLVTAIGD 350
AchiOR1 EELNLKGIYNTRQELGGNFRSGALQTFGQGG--VGPNGLTKKQELMVRSAIKYWVERHKKHVRLVTAIGD 348
AglaOrco EELNLKGIYNTRQELGGNFRSGALQTFGQGG--VGPNGLTKKQELMVRSAIKYWVERHKKHVRLVTAIGD 348
*****:*.***:*****:*.*.***** *****:*****:*****:***** 333

AbunOR25 AYGVALLLHMLTSTVMLTLLAYQATKINGVNTYAASVIGYLVYSLAQVFHFCIFGNRLIESSSVMEAAAY 420
AgerOR25 AYGVALLLHMLTSTVMLTLLAYQATKINGVNTYAATTIGYLVYSLAQVFHFCIFGNRLIESSSVMEAAAY 420
AchiOR1 AYGVALLLHMLTSTVMLTLLAYQATKINGVNTYAATTIGYLVYSLAQVFHFCIFGNRLIESSSVMEAAAY 418
AglaOrco AYGVALLLHMLTSTVMLTLLAYQATKINGVNTYAATTIGYLVYSLAQVFHFCIFGNRLIESSSVMEAAAY 418
*****:*****:*****:*****:*****:*****:***** 402

AbunOR25 SCHWYDGS EEA KTFVQIVCQQCQKAMQISGAKFFTISLDLFASVLGAVVTYFMVLVQLK 479
AgerOR25 SCHWYDGS EEA KTFVQIVCQQCQKAMQISGAKFFTISLDLFASVLGAVVTYFMVLVQLK 479
AchiOR1 SCHWYDGS EEA KTFVQIVCQQCQKAMQISGAKFFTISLDLFASVLGAVVTYFMVLVQLK 477
AglaOrco SCHWYDGS EEA KTFVQIVCQQCQKAMQISGAKFFTISLDLFASVLGAVVTYFMVLVQLK 477
*****:*****:***** ***** ***** 459

```

Figure S6. Amino acid sequence alignment of four known Orcos AgerOR25, AchiOR1, AglaOrco from Cerambycidae and AbunOR25 from *A. bungii*. The multiple alignment and homology of each ORs were calculated using ClustalW2 (<http://www.ebi.ac.uk/Tools/msa/clustalw2/>).







```

AbunOR5  MSSNVKLQYFKKHLKWLKILGIDIEPVKQVWYAQIYRAYAVTLLSYLYLYSFLELIDIIQ 60
McarOR3   MSQKVDLPQYFKKHLKWLTLGLGIDIPIEKVWYAIPYKLYAFVLLVYVLYSLLEIIDIVK 60
          *:.*. *****. ***** *:***** *: *.** *:*****:*.***:.* 48

AbunOR5  SPDFNSMTFGLSYFVTHIIGGAKITILALKKPRFRQMFLESGSFAPNMERGGDEEFRL 120
McarOR3   SSDFNSMTFGLSYSVTHILGAAKITILILKKKILRDMILIRLEQGYFVPNKARGGEKEQQL 120
          *.***** *****:*.***** *** :*:.*:.*.* *.* ** *:.*:.* :* 96

AbunOR5  VKAAVRRTNIHADVFNTFVWLIIGIRSLYAVFDKGAVATYYDKGLNITVSRQVRTLPYKA 180
McarOR3   VNASVIRANLHADIFNTLVYLIIGIRCLYAFDKGVYVEVLDEKLNVTTLKHIRTLPYKA 180
          *:.*.* *:.*:***:***:*.*****.***:*****. . *: **.* :.:***** 145

AbunOR5  WSPVDLNEPAYEIMFAIQTSCLLLYGFIYGFGLDSIVYGMMIHMNTQYLLLRHLLSRYP 240
McarOR3   WLPVDLNKSPAYEFMFIIQASCLVLYGYYIGFLDSLIIYGMMIHMNNQYLIILRNILEHYVE 240
          * *****:*****:.* **:*.*:***:*****:.* *****:.*.*:.*:.* 200

AbunOR5  IAKKIALN-NRENVQDELS-ESIKLPEGIEKTIILGDPLQKIIKRIVHYSAEYHIEILKY 298
McarOR3   LAKNIVLNRPNSVTDDTSTDYIKLHNGIERQKTLAGPVLVDVIENIAYHCAKYHLAIDY 300
          :*:.*.* * :.* *: * : *** :***: *.** :.*.*:.*:.*:.*:.*:.*:.* 239

AbunOR5  CDQIESEFSYLMLLQFLCSLYILCFQLYQLSLVTNYLSFDSISMCLYLFMSYQLICYCW 358
McarOR3   CDDIEKEFSNLMLLQFLSSLYILCFQLFQLSLVTNYFSFDCISMCLYLILMMYQLFCYCW 360
          **:.*.*** *****.*****:*****:***.*****:.* ***:***** 294

AbunOR5  YGNEVVVQSSEFSSYLYNTEWLLFNDSTRKSLLMMMRQRPTIFTAGKFAILSMETYIA 418
McarOR3   YGNAVMIQSLDISSVIYNTDWLVNTESTKKCLLLMMMRQRPIIFTAGKFAFLSLPTYMA 420
          *** *:.*:.* :.* *:***:***: *:***:*.*****:*** *****:.*: **.* 347

AbunOR5  IVRGSASYFMVLKQMAR 435
McarOR3  IVRGSASYFMVLQQMQ- 436
          *****:.*

```

Figure S8. Amino acid sequence alignment of AbunOR3 and McarOR3 (Mcar, *M. caryae*). The multiple alignment and homology of each ORs were calculated using ClustalW2 (<http://www.ebi.ac.uk/Tools/msa/clustalw2/>).



|          |                                                                                                                                                                                                                                                                                                                                                                                                                                                                     |     |
|----------|---------------------------------------------------------------------------------------------------------------------------------------------------------------------------------------------------------------------------------------------------------------------------------------------------------------------------------------------------------------------------------------------------------------------------------------------------------------------|-----|
| McarOR20 | SIK <sup>NH</sup> Y <sup>Y</sup> Y <sup>H</sup> I <sup>L</sup> D <sup>L</sup> M <sup>A</sup> I <sup>M</sup> I <sup>S</sup> M <sup>F</sup> T <sup>T</sup> Y <sup>S</sup> F <sup>S</sup> I <sup>V</sup> F <sup>F</sup> F <sup>N</sup> I <sup>K</sup> S <sup>A</sup> V <sup>R</sup> L <sup>Y</sup> M <sup>T</sup> L <sup>S</sup> D <sup>F</sup> E <sup>D</sup> H <sup>G</sup> K <sup>P</sup> R <sup>N</sup> F <sup>D</sup> K <sup>R</sup> T                            | 120 |
| AbunOR37 | -----                                                                                                                                                                                                                                                                                                                                                                                                                                                               | 1   |
| McarOR20 | KLIDK <sup>V</sup> V <sup>T</sup> Y <sup>Y</sup> Y <sup>I</sup> Y <sup>I</sup> E <sup>F</sup> L <sup>I</sup> I <sup>F</sup> M <sup>L</sup> S <sup>T</sup> S <sup>N</sup> V <sup>S</sup> S <sup>G</sup> K <sup>C</sup> K <sup>K</sup> K <sup>N</sup> K <sup>K</sup> Y <sup>C</sup> L <sup>N</sup> E <sup>V</sup> C <sup>G</sup> L <sup>F</sup> S <sup>Y</sup> T <sup>W</sup> M <sup>P</sup> F <sup>E</sup> I <sup>D</sup> Y                                          | 180 |
| AbunOR37 | -----M <sup>N</sup> V <sup>L</sup> K <sup>N</sup> E <sup>R</sup> Q <sup>C</sup> E <sup>R</sup> E <sup>N</sup> L <sup>E</sup> Y <sup>N</sup> F <sup>H</sup> E <sup>V</sup> C <sup>G</sup> L <sup>A</sup> M <sup>Y</sup> T <sup>W</sup> L <sup>P</sup> F <sup>D</sup> I <sup>D</sup> Y                                                                                                                                                                                | 37  |
|          | . : . . . : * : : * : * : : * * * * * * * * * * : * * : * * *                                                                                                                                                                                                                                                                                                                                                                                                       |     |
| McarOR20 | Y <sup>P</sup> V <sup>K</sup> Q <sup>I</sup> Y <sup>T</sup> T <sup>I</sup> C <sup>Q</sup> L <sup>V</sup> G <sup>T</sup> H <sup>Y</sup> L <sup>I</sup> I <sup>L</sup> A <sup>G</sup> V <sup>V</sup> S <sup>C</sup> L <sup>M</sup> A <sup>E</sup> T <sup>M</sup> E <sup>Q</sup> I <sup>I</sup> T <sup>R</sup> I <sup>H</sup> H <sup>A</sup> R <sup>Y</sup> L <sup>F</sup> L <sup>E</sup> A <sup>I</sup> K <sup>E</sup> K <sup>D</sup> Y <sup>A</sup> K <sup>Q</sup> R | 240 |
| AbunOR37 | F <sup>P</sup> A <sup>K</sup> Q <sup>I</sup> Y <sup>L</sup> S <sup>F</sup> Q <sup>F</sup> F <sup>G</sup> I <sup>H</sup> L <sup>F</sup> A <sup>V</sup> M <sup>G</sup> I <sup>A</sup> A <sup>W</sup> S <sup>A</sup> M <sup>E</sup> T <sup>V</sup> Y <sup>H</sup> V <sup>I</sup> I <sup>R</sup> H <sup>A</sup> K <sup>H</sup> L <sup>F</sup> L <sup>E</sup> A <sup>I</sup> N <sup>E</sup> E <sup>N</sup> Y <sup>Q</sup> R <sup>Q</sup> R                               | 97  |
|          | : * . * * * * * * : * . * * * : : * : : . * * : : * * * : * * : * * * * * : * : * : * *                                                                                                                                                                                                                                                                                                                                                                             | 70  |
| McarOR20 | Q <sup>M</sup> F <sup>N</sup> T <sup>A</sup> V <sup>R</sup> Y <sup>H</sup> I <sup>G</sup> V <sup>L</sup> D <sup>L</sup> E <sup>D</sup> P <sup>L</sup> N <sup>E</sup> T <sup>Y</sup> G <sup>F</sup> F <sup>M</sup> L <sup>T</sup> H <sup>L</sup> A <sup>M</sup> T <sup>A</sup> P <sup>I</sup> I <sup>G</sup> T <sup>A</sup> L <sup>Y</sup> S <sup>I</sup> L <sup>Y</sup> G <sup>G</sup> S <sup>G</sup> S <sup>S</sup> T <sup>F</sup> I <sup>C</sup> L <sup>G</sup>   | 300 |
| AbunOR37 | E <sup>K</sup> F <sup>N</sup> L <sup>A</sup> V <sup>R</sup> Y <sup>H</sup> E <sup>S</sup> V <sup>L</sup> R <sup>L</sup> E <sup>D</sup> L <sup>L</sup> N <sup>E</sup> T <sup>F</sup> G <sup>V</sup> F <sup>M</sup> F <sup>T</sup> H <sup>L</sup> A <sup>I</sup> T <sup>A</sup> P <sup>I</sup> L <sup>G</sup> T <sup>G</sup> L <sup>F</sup> G <sup>L</sup> L <sup>H</sup> A <sup>G</sup> S <sup>I</sup> S <sup>S</sup> L <sup>L</sup> L <sup>A</sup> I <sup>G</sup>   | 157 |
|          | : * * * * * * * . * * * * * * * : * . * * : * * * : * * * : * * : * * . * : : . * * * * : : : *                                                                                                                                                                                                                                                                                                                                                                     | 117 |
| McarOR20 | W <sup>F</sup> I <sup>G</sup> V <sup>M</sup> K <sup>D</sup> C <sup>C</sup> C <sup>G</sup> Q <sup>R</sup> L <sup>S</sup> Q <sup>S</sup> N <sup>T</sup> V <sup>P</sup> I <sup>A</sup> I <sup>Y</sup> D <sup>S</sup> E <sup>W</sup> Y <sup>T</sup> C <sup>N</sup> E <sup>E</sup> I <sup>K</sup> K <sup>D</sup> I <sup>L</sup> F <sup>V</sup> L <sup>M</sup> R <sup>C</sup> R <sup>R</sup> E <sup>P</sup> M <sup>Y</sup> P <sup>K</sup> A <sup>I</sup> S <sup>F</sup>   | 360 |
| AbunOR37 | W <sup>F</sup> F <sup>G</sup> V <sup>T</sup> V <sup>G</sup> C <sup>L</sup> S <sup>G</sup> Q <sup>R</sup> L <sup>E</sup> N <sup>E</sup> S <sup>L</sup> S <sup>V</sup> A <sup>T</sup> T <sup>I</sup> Y <sup>N</sup> S <sup>P</sup> W <sup>Y</sup> N <sup>C</sup> S <sup>K</sup> D <sup>L</sup> R <sup>R</sup> D <sup>I</sup> V <sup>I</sup> V <sup>L</sup> M <sup>R</sup> C <sup>R</sup> R <sup>E</sup> P <sup>M</sup> Y <sup>L</sup> K <sup>A</sup> A <sup>S</sup> F | 217 |
|          | * * : * * . * . * * * : : * : * . : * * : * * * : * * : * * : * * * * * * * * * * * * * * * * * *                                                                                                                                                                                                                                                                                                                                                                   | 163 |
| McarOR20 | G <sup>V</sup> L <sup>D</sup> H <sup>V</sup> M <sup>F</sup> L <sup>G</sup> V <sup>V</sup> K <sup>A</sup> A <sup>Y</sup> S <sup>Y</sup> I <sup>A</sup> L <sup>L</sup> S <sup>Q</sup> T <sup>T</sup>                                                                                                                                                                                                                                                                  | 386 |
| AbunOR37 | G <sup>I</sup> M <sup>N</sup> H <sup>V</sup> M <sup>L</sup> L <sup>G</sup> I <sup>L</sup> K <sup>G</sup> S <sup>Y</sup> S <sup>Y</sup> I <sup>T</sup> L <sup>L</sup> A <sup>Q</sup> --                                                                                                                                                                                                                                                                              | 241 |
|          | * : : . * * * : * * * : * : * * * : * * * * * *                                                                                                                                                                                                                                                                                                                                                                                                                     | 186 |

**Figure S10. Amino acid sequence alignment of McarOR3 (Mcar, *M. caryae*) and AbunOR37.** The multiple alignment and homology of each ORs were calculated using ClustalW2 (<http://www.ebi.ac.uk/Tools/msa/clustalw2/>).

**Table S1** Primers of *A. bungii* chemosensory receptor genes used for RT-qPCR

| Gene name                      | Forward primer (5'-3')    | Reverse primer (5'-3')   |
|--------------------------------|---------------------------|--------------------------|
| <b>Odorant receptors (ORs)</b> |                           |                          |
| <i>AbunOR1</i>                 | CAAGAGTAAGAAGATACCATAT    | AGCATTGTGTAGTAGGAA       |
| <i>AbunOR2</i>                 | TATGATACTGATGGAGAG        | ACTGCTAACAATGAATAC       |
| <i>AbunOR3</i>                 | CTAGTCTTGACATAGGT         | AATAGGTAGTTGAGAATAGC     |
| <i>AbunOR4</i>                 | ATTACCAGCACAACTTCT        | ACTCCTTATCATCATTAGCA     |
| <i>AbunOR5</i>                 | CAGATATGTTCCGATTGCTAAG    | CCAGTATAATTGTCTTCTCTATGC |
| <i>AbunOR6</i>                 | GACGAGACCTCTACAATA        | GAGTAACACCAGTAACAC       |
| <i>AbunOR7</i>                 | CTTCGTGTCAGAACTTATAC      | CATTATCTCGTTGGCATACT     |
| <i>AbunOR8</i>                 | CAGAGGAGAATGGATGAGAA      | CGTGAACAAGAAGGTTAGC      |
| <i>AbunOR9</i>                 | CCGAGAAGGACATCCAAGT       | AACAAGGTAATAGGCATCAACAG  |
| <i>AbunOR10</i>                | GGTATGCTCATTCTCCCAAAC     | CGCCAAACACGATTCCAA       |
| <i>AbunOR11</i>                | CCGTCTGGAAGTATCAACTAT     | TCTGGTGAAGCAAGGTAAG      |
| <i>AbunOR12</i>                | AATCCTTCGGCGTTAGTG        | TGAACAGTTAGATAATCAGCATTG |
| <i>AbunOR13</i>                | GGAAGTATAATAATGATGA       | TAGAATAGCAACTCTTGA       |
| <i>AbunOR14</i>                | ATGTCTTTGGAAATGGCCTTAA    | GAAGTGAAGCCTGCTGAAG      |
| <i>AbunOR15</i>                | TTAGTATTGCTGGAATGAC       | TATGAAGTGGTCGTTATTAC     |
| <i>AbunOR16</i>                | CGTCTACCGTTAGTGGATTG      | CACCGCAGCAGTAGTTAC       |
| <i>AbunOR17</i>                | CTGTTACTATTATCTGTATGACT   | AATATGTGGTGAAGTATGC      |
| <i>AbunOR18</i>                | GTTTATGACATTCCTTGGTTGCGTA | CGAGTTCTGGGTCGTCGTCAT    |
| <i>AbunOR19</i>                | TCAATAATGCTGCTTGTATA      | ATAACCTGTGCTGGAATA       |
| <i>AbunOR20</i>                | TCTGTGGCTATTGTATCT        | GGTTCTGCTGTAGTTAAG       |
| <i>AbunOR21</i>                | CGTGAGCCAGTTCAGAGTA       | ATGTCTCGTTCGCCCTCA       |
| <i>AbunOR22</i>                | AAGAGACTACGGCAATAG        | AGTGAGATACGAGTAAGAC      |
| <i>AbunOR23</i>                | GGCAATTCCATATACTGTCAT     | GACTCCTTATCAACATTATCAGA  |
| <i>AbunOR24</i>                | ATCCTGATGGTATTCTTC        | GATGTCCTTAGTCTTGTCT      |
| <i>AbunOR25</i>                | GAAGAAGCAGGAAGTCAAT       | TCACCAATAGCAGTAACAA      |
| <i>AbunOR26</i>                | CCAGAAGGAGGTTATGAA        | TACAAGCAAGAAGAAGGT       |
| <i>AbunOR27</i>                | TTAGACGAGACAAGTTCAA       | CATCATTATCAGTAAGCAAGT    |
| <i>AbunOR28</i>                | CTGATATAACCATACCAATAGA    | CTGCTTCATCGTAAGTAAT      |
| <i>AbunOR29</i>                | ATATGAAGGTGAATGGTA        | CTAATGTGACTAATGAGAG      |
| <i>AbunOR30</i>                | TATTCGTCACCACTATCC        | TTCTCATACCACTTACTC       |
| <i>AbunOR31</i>                | TAATAACGACGACTTCAA        | AACAATACATCATAACATCC     |
| <i>AbunOR32</i>                | AGAAGGACCGATAAGTATGAGTA   | TGTAGATGAAGAGGCTTGTG     |
| <i>AbunOR33</i>                | TGAAGATATGTGCGAGTC        | AGATTGTAACCGTTGATGA      |
| <i>AbunOR34</i>                | ACTTACCTCTGTGTTATACTCTTG  | GCTCTTGCCTATATCCATACTC   |
| <i>AbunOR35</i>                | CGGTAAGGAGGATAGACA        | AATTCAGAGCGGATTCAAT      |
| <i>AbunOR36</i>                | ATAGGTTACGGTTATTATAGG     | AACATTCACTGGTAACATAT     |
| <i>AbunOR37</i>                | CTGTTGGCTGTCTTAGTG        | AAGGGCTGTTGTAAATTGT      |

|                                   |                        |                          |
|-----------------------------------|------------------------|--------------------------|
| <i>AbunOR38</i>                   | ATGCTCGTCCACATAACC     | ATTGAAGTAGTTCGTCTCCAT    |
| <i>AbunOR39</i>                   | AGGTAGCCATCTTGTCGG     | CCTCGCCCTGGTAACTCT       |
| <i>AbunOR40</i>                   | TGCCATGTCAACAGTAAG     | TGTCAAGTGCCTCTAACG       |
| <i>AbunOR41</i>                   | CAATGGACCTCTTGCTCG     | TATCGTCTTCGTCTGTTGG      |
| <i>AbunOR42</i>                   | ATCTCCTGTCCCGTGTG      | ACCCATTCCCTTGACCCTC      |
| <i>AbunOR43</i>                   | TTACAGACGCTTGCTAT      | AGTCATCAATGTGGGAAC       |
| <i>AbunOR44</i>                   | CCTGCGTGGTTTCCTTTC     | GCCATCAATAGCGGGTTT       |
| <i>AbunOR45</i>                   | AGTCTGCCAACTCTACATCTTA | CCATCACTGACGGTCTTC       |
| <b>Ionotropic receptors (IRs)</b> |                        |                          |
| <i>AbunIR1</i>                    | TACCAGCCAATGTCAGAT     | TGTCTCCTATTTCCGTATGA     |
| <i>AbunIR2</i>                    | GATGAAGATACAGGAGTT     | GTGAATATGTTGGTTACG       |
| <b>Gustatory receptors (GRs)</b>  |                        |                          |
| <i>AbunGR1</i>                    | ATTCTGACGATGACTCTTAA   | AGGCATCCATTCTTGAAG       |
| <i>AbunGR2</i>                    | TCCGACGGTTGAGACTAT     | CTATCTTGTAGCGATTCTGATAAC |
| <i>AbunGR3</i>                    | TTATTCATCACACAACAGA    | CATTAGTAGAGGAGCATAT      |
| <i>AbunGR4</i>                    | TGATACACAAGATAAGCAACCT | GCCATCCGAATAATACATCCA    |
| <i>AbunGR5</i>                    | CCATATTCGTTAGCATCAT    | GTACCAGGATACTCAGAA       |
| <i>AbunGR6</i>                    | GGTAGATAACAGAACGAA     | CATCAGCATAACGAGATA       |
| <b>Endogenous reference genes</b> |                        |                          |
| <i>β-actin</i>                    | CGACTTGACTGACTATCTC    | GGTAGTTCGTAGCTCTTC       |

**Table S2** Summary of the gene annotation success ratio

|                         | Number of Unigenes | Percentage (%) |
|-------------------------|--------------------|----------------|
| Annotated in NR         | 25,407             | 60.21          |
| Annotated in NT         | 7,292              | 17.28          |
| Annotated in GO         | 19,959             | 47.29          |
| Annotated in KO         | 12,154             | 28.8           |
| Annotated in PFAM       | 19,426             | 46.03          |
| Annotated in KOG        | 11,787             | 27.93          |
| Annotated in Swiss prot | 19,226             | 45.56          |

|                            |        |       |
|----------------------------|--------|-------|
| Annotated in all Databases | 3,337  | 7.9   |
| Annotated in at least one  | 28,221 | 66.87 |
| Total Unigenes             | 42,197 | 100   |

**Table S3** Summary of FPKM value

| FPKM value | Number of Unigenes |
|------------|--------------------|
| FPKM=0     | 2,696              |
| FPKM>1     | 34,667             |
| FPKM>10    | 8,761              |
